# Supplementary material for: The temperature sensor TWA1 is required for thermotolerance in Arabidopsis
Source: PubMed Central journal article supplement (PMC11136664; doi:10.1038/s41586-024-07424-x), 2024-05-15
Supplement: 41586_2024_7424_MOESM1_ESM.pdf [file 41586_2024_7424_MOESM1_ESM.pdf]

## Supplementary information

---

# The temperature sensor TWA1 is required for thermotolerance in *Arabidopsis*

---

In the format provided by the  
authors and unedited

**Supplementary Table 1. Primers used for genotyping and cloning.**

| <b>PRIMER</b>     | <b>5'→3' sequence</b>                   | <b>REACTION</b>   |
|-------------------|-----------------------------------------|-------------------|
| cpl3-10_f         | TGGCGCCAATCACACGTCGCGCTGAC              | G: <i>cpl3-10</i> |
| cpl3-10_r         | CAACGAAGTACTCTCCAAAACACCAC              |                   |
| jam1-2_f          | ATGAATATGAGTGATTTAGGTTGGG               | G: <i>jam1-2</i>  |
| jam1-2_r          | TTATATATCACCAGAGACCTGTG                 |                   |
| jam2-2_f          | CTTTAGGCTCTCTGCAATATCCATCG              | G: <i>jam2-2</i>  |
| jam2-2_r          | GAGAAAATCTCGGTGGAAGAGACTTG              |                   |
| jam3-2_f          | ATGGGTCAAAAGTTTTGGGAGAATC               | G: <i>jam3-2</i>  |
| jam3-2_r          | TTACTGTGATAGAGAGGCAAGGAG                |                   |
| tpl-8_f           | TTGGTTCCTCGCAAAGATTAG                   | G: <i>tpl-8</i>   |
| tpl-8_r           | GCTATGCTGTTTATTGCAGGC                   |                   |
| tpr2-2_f          | TCCGTCACTCGTGTAGCATGGAG                 | G: <i>tpr2-2</i>  |
| tpr2-2_r          | GTATCAAACCTGAACAACCTCCAGCTG             |                   |
| tpr4-2_f          | TTGATTGTCGGGATTAGAGTAAAG                | G: <i>tpr4-2</i>  |
| tpr4-2_r          | CCAACAGAAGCTGTAATCTTAGAGC               |                   |
| GK-o8409_extended | ATATTGACCATCATACTCATTGCTGATCC           | G: GABI-Kat lines |
| JMLBa1            | TGGTTCACGTAGTGGGCCATCG                  | G: SALK lines     |
|                   |                                         |                   |
| EcoRI-TWA1_f      | CCGGAATTCATGTCTGGAAGCCAAGAGCCTAG        | C: pGAD424        |
| TWA1-BglII_r      | GATCAGATCTTTAAAAACCATCACCACCGAGCTCATCCG | C: pGAD424        |
| SmaI-C-JAM2_f     | GATCCCCGGGCATGAATATTGGTCGCCTAGTGTGG     | C: pGAD424        |
| JAM2-SalI_r       | GATCGTCGACCTATCTACCTGATGATGTTCTTGACTG   | C: pGAD424        |
| EcoRI-twa1-1_f    | CCGGAATTCATGTCTGGAAGCCAAGAGCCTAG        | C: pGAD424        |
| twa1-1-BglII_r    | GATCAGATCTTCAAACATCCATGGTAGTATTCAAATCCC | C: pGAD424        |
| SmaI-AI-TWA1_f    | TTGTCCCAGGTATGTCTGGAAGCCAAGAGCC         | C: pGAD424        |
| AI-TWA1-BglII_r   | TTGTAGATCTTTAAAAACCATCACCACCA           | C: pGAD424        |
| SmaI-Sa-TWA1_f    | TTGTCCCAGGTATGTCTGGAACCAACAGCC          | C: pGAD424        |
| SalI-Sa-TWA1_r    | TTGTGTCGACCTAAAACCCGTCACCACCACCA        | C: pGAD424        |
|                   |                                         |                   |
| SmaI-NotI-TPL-f   | GATCCCCGGGGCGGCCGCATGTCTTCTCTTAGTAGAGA  | C: pBRIDGE        |
| TPL-NotI-SalI-r   | GATCGTCGACGCGGCCGCTCATCTCTGAGGCTGATCAG  | C: pBRIDGE        |
| TPR1-BamHI_f      | ATTAGGATCCCGATGTCTTCTCTGAGCAGAGAGC      | C: pBRIDGE        |
| TPR1-SalI_r       | ATTAGTCGACTCATCTCTGAGGCTGGTCAG          | C: pBRIDGE        |
| EcoRI-TPR2-fwrd   | GATCGAATTCATGTCGTCTTTGAGCAGAGAG         | C: pBRIDGE        |
| TPR2-SalI_rev     | GATCGTCGACTTACCTTTGAATCTGATCCGAACCTTG   | C: pBRIDGE        |
| TPR3-BamHI_f      | ATTAGGATCCCGATGTCGTCGTTGAGTCGAGAG       | C: pBRIDGE        |
| TPR3-SalI_r       | ATTAGTCGACTCATCTTTGTAACGTCTGAGTTTG      | C: pBRIDGE        |
| TPR4-BamHI_f      | ATTAGGATCCCGATGTCGTCGACTCAGCAGAGAAC     | C: pBRIDGE        |
| TPR4-SalI_r       | ATTAGTCGACCTACGAATCACTCGGTTGTTGATCTG    | C: pBRIDGE        |
| EcoRI-JAM1_f      | gatcGAATTCATGAATATGAGTGATTTAGGTTGGGATG  | C: pBRIDGE        |
| JAM1-SalI_r       | GATCGTCGACTTATATATCACCAGAGACCTGTGA      | C: pBRIDGE        |
| BamHI-JAM2_f      | GATCGGATCCATGAATATTGGTCGCCTAGTGTGG      | C: pBRIDGE        |
| JAM2-SalI_r       | GATCGTCGACCTATCTACCTGATGATGTTCTTGACTG   | C: pBRIDGE        |
| SmaI-C-JAM3_fwrd  | GATCCCCGGGCATGGGTCAAAAGTTTTGGG          | C: pBRIDGE        |
| JAM3-BamHI_r      | GATCGGATCCTTACTGTGATAGAGAGGCAAGGAGC     | C: pBRIDGE        |

|                    |                                              |                                           |
|--------------------|----------------------------------------------|-------------------------------------------|
| SmaI-C-MYC2_fwd    | CCCGGGcATGACTGATTACCGGCTACAACC               | C: pBRIDGE                                |
| MYC2-PstI_r        | GATCCTGCAGTTAACCGATTTTTGAAATCAAACCTTGCTC     | C: pBRIDGE                                |
| Sal-AIHVR-TWA1_f   | TTGTGTCGACATGTCTGGAAGCCAAGAGCCTAGG           | C: pGREG574                               |
| TWA1-SalI_r        | TTGTGTCGACTTAAAAACCATCACCACCGA               | C: pGREG574                               |
| EcoRI-TWA1_f       | CCGGAATTCATGTCTGGAAGCCAAGAGCCTAG             | C: pSK_AscI_p35SS1-3xHA-tag-10xAla-nosTER |
| TWA1-BglII_r       | GATCAGATCTTTAAAAACCATCACCACCGAGCTCATCCG      | C: pSK_AscI_p35SS1-3xHA-tag-10xAla-nosTER |
| PstI-ATG-ΔN-TWA1_f | GATCCTGCAGATGGATGAACTTTCAGAAATGATGAAGAG      | C: pSK_AscI_p35SS1-nosTER                 |
| ΔN-TWA1-BglII_r    | GATCAGATCTTTAAAAACCATCACCACCGAGCTCATCCG      | C: pSK_AscI_p35SS1-nosTER                 |
| EcoRI-twa1-1_f     | CCGGAATTCATGTCTGGAAGCCAAGAGCCTAG             | C: pSK_AscI_p35SS1-nosTER                 |
| twa1-1-SalI_r      | GATCGTCGACTCAAACATCCATGGTAGTATTCAAATCCC      | C: pSK_AscI_p35SS1-nosTER                 |
| EcoRI-JAM1-f       | GATCGAATTCATGAATATGAGTGATTTAGGTTGGG          | C: pSK_AscI_p35SS1-nosTER                 |
| SalI-JAM1-r        | gatcGTCGACTTATATATCACCAGAGACCTGTG            | C: pSK_AscI_p35SS1-nosTER                 |
| SmaI-JAM2-f        | GATCCCCGGGATGAATATTGGTCGCCTAGTGTGG           | C: pSK_AscI_p35SS1-nosTER                 |
| JAM2-SalI_r        | GATCGTCGACCTATCTACCTGATGATGTTCTTGACTG        | C: pSK_AscI_p35SS1-nosTER                 |
| SmaI-C-JAM3_fwd    | GATCCCCGGGCATGGGTCAAAGTTTTGGG                | C: pSK_AscI_p35SS1-nosTER                 |
| JAM3-BamHI_r       | GATCGGATCCTTACTGTGATAGAGAGGCAAGGAGC          | C: pSK_AscI_p35SS1-nosTER                 |
| SmaI-NotI-TPL-f    | GATCCCCGGGGCGGCCGCATGTCTTCTTAGTAGAGA         | C: pSK_AscI_p35SS1-nosTER                 |
| TPL-NotI-SalI-r    | GATCGTCGACGCGGCCGCTCATCTCTGAGGCTGATCAG       | C: pSK_AscI_p35SS1-nosTER                 |
| SmaI-NotI-TPR2-fwd | GATCCCCGGGGCGGCCGCATGTCGCTTTGAGCAGAGAG       | C: pSK_AscI_p35SS1-nosTER                 |
| TPR2-PstI-SalI-rev | GATCGTCGACCTGCAGTTACCTTTGAATCTGATCCGAACTTG   | C: pSK_AscI_p35SS1-nosTER                 |
| SalI-TPR4_f        | GATCGTCGACATGTCGTCACTCAGCAGAGAAC             | C: pSK_AscI_p35SS1-nosTER                 |
| TPR4-BglII_r       | GATCAGATCTCTACGAATCACTCGGTTGTTGATCTG         | C: pSK_AscI_p35SS1-nosTER                 |
| SmaI-AI-TWA1_f     | TTGTCCCAGGATGTCTGGAAGCCAAGAGCC               | C: pSK_AscI_p35SS1-nosTER                 |
| AI-TWA1-SacI_r     | TTGTGAGCTCTTAAAAACCATCACCACCA                | C: pSK_AscI_p35SS1-nosTER                 |
| SmaI-Sa-TWA1_f     | TTGTCCCAGGATGTCTGGAACCAACAGCC                | C: pSK_AscI_p35SS1-nosTER                 |
| SalI-Sa-TWA1_r     | TTGTGTCGACCTAAAACCCGTCACCACCACCA             | C: pSK_AscI_p35SS1-nosTER                 |
| pHSFA2-SacII_fwd   | GATCCCCGGGCTTTGCCAATTCCTCTGTCCTCG            | C: pSK_AscI_pHSFA2-LUC-nosTER             |
| pHSFA2-BamHI_rev   | GATCGGATCCTTCCACTTTCAGTTCCTCCATTTTCGTTG      | C: pSK_AscI_pHSFA2-LUC-nosTER             |
| BglII-3UTR-TWA1_f  | GATCAGATCTAATAAAGGTTAGTATTCAATTTGCTTTAACCTTC | C: TWA1-3'UTR                             |
| 3'UTR-TWA1-BglII_r | GATCAGATCTGAAAAGAAAAGACTATAAATGTGTGTAG       |                                           |
| NotI-pTWA1_f       | GATCGCGGCCGCCTTTGTTCTTTCACTTCAACTCTTTGG      | C: TWA1 promoter + TWA1-5'UTR             |
| 5'UTR-TWA1-SmaI_r  | GATCCCCGGGAGTTGAACTTCGAGGGTCTAAT             |                                           |

**Supplementary Table 2. Primers used for qPCR expression analysis.**

| <b>PRIMER</b> | <b>5'→3' sequence</b>            | <b>REACTION</b>                                 | <b>REFERENCE</b>                                                                                                                                           |
|---------------|----------------------------------|-------------------------------------------------|------------------------------------------------------------------------------------------------------------------------------------------------------------|
| TIP41L_f      | GTGAAAACCTGTTGGAGAGAAGCAA        | qPCR reference gene<br>(At4g34270)              |                                                                                                                                                            |
| TIP41L_r      | TCAACTGGATACCCTTTTCGCA           |                                                 |                                                                                                                                                            |
| UBC9_f        | TCACAATTTCCAAGGTGCTGC            | qPCR reference gene<br>(AT4G27960)              |                                                                                                                                                            |
| UBC9_r        | TCATCTGGGTTTGGATCCGT             |                                                 |                                                                                                                                                            |
| UBI10_f       | GGCCTTGTATAATCCCTGATGAAT<br>AAG  | qPCR reference gene<br>(At4g05320)              |                                                                                                                                                            |
| UBI10_r       | AAAGAGATAACAGGAACGGAAAC<br>ATAGT |                                                 |                                                                                                                                                            |
| HSFA2_f       | GTGTTGAGGTTGGGCAATACG            | HSFA2 (AT2G26150)                               | Ayako et al, 2011 Plant and Cell Physiology,<br><a href="https://doi.org/10.1093/pcp/pcr045">https://doi.org/10.1093/pcp/pcr045</a>                        |
| HSFA2_r       | TTGCTGTTGCCTCAACCTAACTAC         |                                                 |                                                                                                                                                            |
| HSP17.6_f     | GCACGTGTTCAAGGCGGATTAC           | HSP17.6 (AT1G53540)                             | Volkov et al, 2003 Journal of Experimental<br>Botany, <a href="https://doi.org/10.1093/jxb/erg244">https://doi.org/10.1093/jxb/erg244</a>                  |
| HSP17.6_r     | TCACACATTTTGGTCTTAAACAAT<br>TCC  |                                                 |                                                                                                                                                            |
| HSP18.2_f     | CCGTTCTCGCAAGACTTATGG            | HSP18.2 (AT5G59720)                             |                                                                                                                                                            |
| HSP18.2_r     | GAAGCGTTTGCCAACGCAGAA            |                                                 |                                                                                                                                                            |
| HSP70         | CATGACCGCGTCGAAATCATCG           | HSP70 (AT3G12580)                               | Zhang et al 2019, Plant Signaling &<br>Behavior, <a href="https://doi.org/10.1080/15592324.2019.1670596">https://doi.org/10.1080/15592324.2019.1670596</a> |
| HSP70         | GCCAGTGACTCTTATCCGCTTGAA<br>C    |                                                 |                                                                                                                                                            |
| HSP21_f       | CGCTTAACCATGGACGTCTCTC           | HSP21 (AT4G27670)                               | Kim et al 2012, G3<br>Genes/Genomes/Genetics,<br><a href="https://doi.org/10.1534/g3.112.003368">https://doi.org/10.1534/g3.112.003368</a>                 |
| HSP21_r       | CTGACACTCCACTTCCTCCTC            |                                                 |                                                                                                                                                            |
| HSP26.5_f     | TGTGAAAGAGGTTTGGTCGG3            | HSP26.5 (AT1G52560)                             | designed with Primer3Plus<br>(bioinformatics.nl)                                                                                                           |
| HSP26.5_r     | TGTTACGCCAGAGGCTTTT              |                                                 |                                                                                                                                                            |
| TWA1_qP       | CTCCACTCAGATTCCACAACC            | TWA1 (Atg513590)                                |                                                                                                                                                            |
| TWA1_qP       | TCCAATGCTCTTCCCTTAC              |                                                 |                                                                                                                                                            |
| cis7_f        | GACGTGGCAGGACGAAACGG             | qPCR pRD29B promoter<br>fragments, ChIP samples |                                                                                                                                                            |
| cis7_r        | CTCTCTGGCTTCTGTCTCTTTAC          |                                                 |                                                                                                                                                            |
| cis6_f        | CATCGATAGGCTTCTCTAAAGATC         |                                                 |                                                                                                                                                            |
| cis6_r        | CAGCCAGTTGCTCTCTACGTG            |                                                 |                                                                                                                                                            |
| cis5_f        | GCCAAATAACTACATGATGGGCC          |                                                 |                                                                                                                                                            |
| cis5_r        | GATCTTTAGAGAAGCCTATCGATG         |                                                 |                                                                                                                                                            |
| cis4_f        | GCTGAATTGATTTTTTCTTTTGCCG        |                                                 |                                                                                                                                                            |
| cis4_r        | GCCCATCATGTAGTTATTTGGC           |                                                 |                                                                                                                                                            |
| cis3_f        | GAGTACGTTATGCCGTTTTAAATG         |                                                 |                                                                                                                                                            |
| cis3_r        | CGGCAAAAGAAAAAATCAATTCAG<br>C    |                                                 |                                                                                                                                                            |
